# Supplementary material for: Understanding monsoon controls on the energy and mass balance of Himalayan glaciers
Source: Copernicus journal article supplement (doi:10.5194/tc-2021-97), 2021-05-10
Supplement: Supplementary file 1 [file tc-2021-97-supplement-version1.pdf]

## Supplementary Material

795 **Understanding monsoon controls on the energy and mass balance of glaciers in the Central and Eastern Himalaya**

*Authors: Stefan Fugger<sup>1,2</sup>, Catriona L. Fyffe<sup>3</sup>, Simone Fatichi<sup>4</sup>, Evan Miles<sup>1</sup>, Michael McCarthy<sup>1,5</sup>, Thomas E. Shaw<sup>1</sup>, Bao-hong Ding<sup>6</sup>, Wei Yang<sup>6</sup>, Patrick Wagnon<sup>7</sup>, Walter Immerzeel<sup>8</sup>, Qiao Liu<sup>9</sup>, and Francesca Pellicciotti<sup>1,3</sup>*

800 The Supplementary Material includes additional descriptions of data sets, extended figures, tables, methods and analysis, and is structured into these topics:

S1. Climatic and meteorological conditions

S2. Data selection and monsoon definition

S3. Aerodynamic resistance and aerodynamic roughness

805 S4. Extended results

S5. Sensitivity of seasonal flux changes to elevation and debris thickness

S6. Controls on turbulent fluxes

## S1. Climatic and meteorological conditions

810 Average mean monthly 2 m air temperatures have a similar pattern at all study sites (Figure S1a), with a slow increase from January to a peak between July and August, just after peak monsoon, and a steeper decline from post-monsoon into winter. Incoming shortwave radiation (Figure S1b) shows a clear peak before monsoon onset at all sites. A smaller secondary peak is reached just after the monsoon in October at the Central Himalayan sites, but not at the Eastern Himalayan sites. Interruptions in monsoonal overcast conditions (break periods) seem to be more common at the eastern sites, leading to occasional secondary peaks in incoming shortwave radiation during monsoon.  $LW_{\downarrow}$  follows a similar regime as  $Ta$ , with highest values reached 815 during the core monsoon (Figure S1c). The yearly cycle of wind speeds (Figure S1d) varies considerably between sites. Common characteristics for most sites (except for Changri Nup) are that wind speeds are highest around December/January and that monsoonal wind speeds are generally higher than during the shoulder seasons. There is a clear difference in the seasonal evolution of precipitation between the Central (Lirung, Lantang, Yala, Changri Nup) and the Eastern Himalayan sites (24K, Parlung No.4, Hailuogou) (Figure S1e): relatively high mean monthly precipitation during the monsoon period is contrasted 820 by comparably low precipitation outside of this period. The eastern sites have less pronounced monsoonal precipitation peaks, and more gradual changes in precipitation intensities over the annual cycle. The Parlung sites (24K and Parlung No.4) have two precipitation peaks: during spring and monsoon. Hailuogou exhibits the smoothest evolution over the annual cycle with a clear maximum in July. A simple monsoon index (MI) is calculated for each year including the study year as the ratio between monsoon precipitation and annual average precipitation (Figure S1e). This value tends to be higher in the Central Himalaya 825 compared to the sites on the South-Eastern Tibetan Plateau.

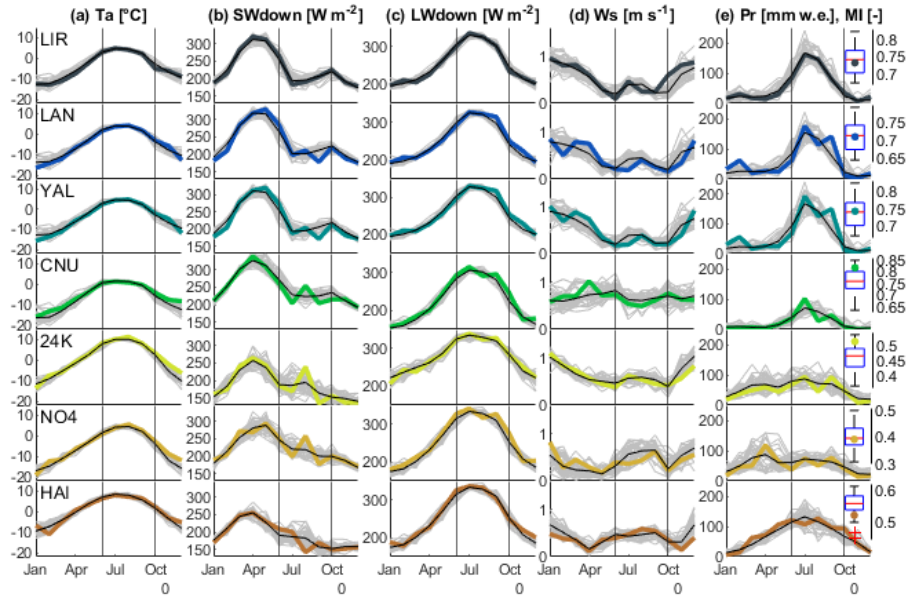

**Figure S1.** Monthly climatology derived from ERA5-Land for 1981-2019 (grey background lines), along with the monthly averages (black lines) and the study year at each glacier (colored lines). Plotted meteorological variables are **(a)** mean air temperature ( $Ta$ ), **(b)** incoming shortwave radiation ( $SW_{\downarrow}$ ), **(c)** incoming longwave radiation ( $LW_{\downarrow}$ ), **(d)** wind speed ( $Ws$ ) and **(e)** monthly precipitation sums ( $Pr$ ). Black vertical lines indicate the average region-wide monsoon season. Boxplots show the monsoon index ( $MI$ ) over ERA5-Land period as the fraction of monsoonal (June-September) to annual precipitation, with the colored dot indicating the value for the study year.

## S2. Data selection and monsoon definition

The records and periods were chosen under considering the following criteria:

- Data availability
- 830 – Completeness of records (few or no data gaps)
- Availability of complete forcing data for modelling, including precipitation records
- Availability of ablation stake measurements or other recordings of surface lowering (e.g. Ultrasonic Depth Gauge)
- Highest quality and reliability of records (No unrealistic/erroneous/disagreeing records)
- Possibility to substitute from other stations when criteria 1.-4. were not met

835 At each site, we define the onset and recession date of monsoon based on visual inspection of the AWS records (Figures SS2 to SS8) following this procedure:

1. Inspect  $SW \downarrow$  to identify a period with sustained cloud overcast and with few interruptions therein, lowering  $SW \downarrow$
2. Inspect  $LW \downarrow$  and compare the timing of constantly higher  $LW \downarrow$  with the above
3. Identify the period of increased rainfall frequency and intensity
- 840 4. Inspect the relative humidity to see whether the timing of sustained humid conditions would agree with the above
5. Identify a plateau in average air temperature and dampening of the daily air temperature amplitude
6. Inspect wind speed to identify a regime change (mean and amplitude)

This was the general procedure followed, but the order was varied, when one or the other variable provided a clearer indication. We note, that in some cases, where heavy cloud cover and rainy conditions dominate the local weather from spring to autumn  
845 (e.g. Hailuogou, 24K) this distinction was less clear than in others, and some uncertainty remains around the exact monsoon onset and cessation dates at those study sites.

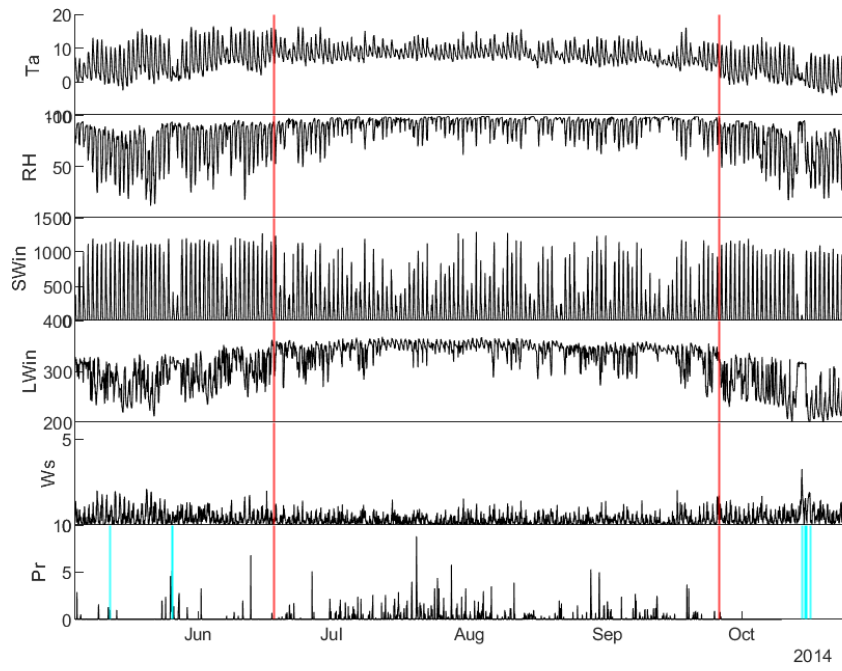

**Figure S2.** Meteorological observations on Lirung during the ablation season recorded by AWS; Red vertical lines indicate monsoon onset and end; cyan indicates time steps with snow cover at the AWS location, as determined from  $\alpha$  ( $>0.5$ )

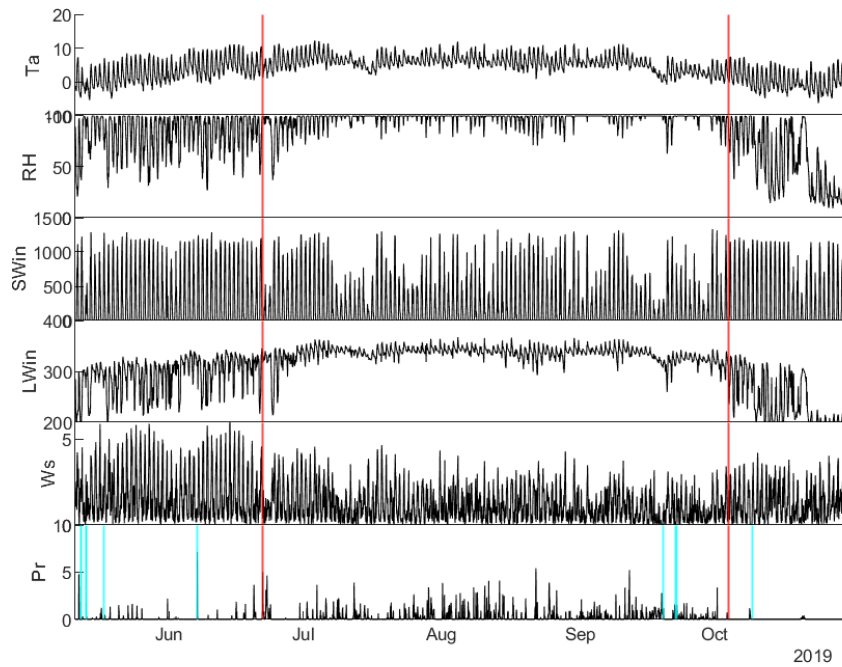

**Figure S3.** Meteorological observations on Langtang during the ablation season recorded by AWS; Red vertical lines indicate monsoon onset and end; cyan indicates time steps with snow cover at the AWS location, as determined from  $\alpha$  ( $>0.5$ )

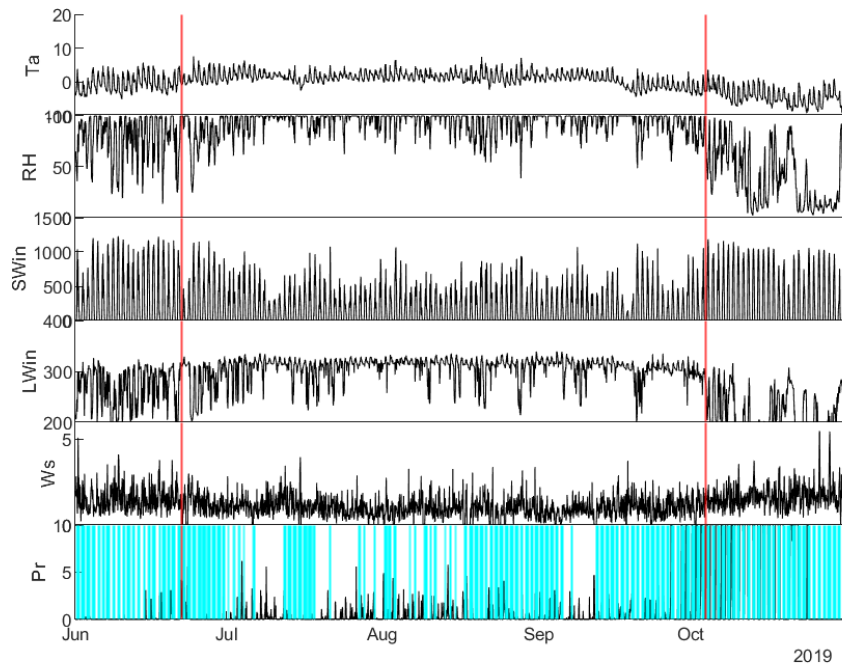

**Figure S4.** Meteorological observations on Yala during the ablation season recorded by AWS; Red vertical lines indicate monsoon onset and end; cyan indicates time steps with snow cover at the AWS location, as determined from  $\alpha$  ( $>0.5$ )

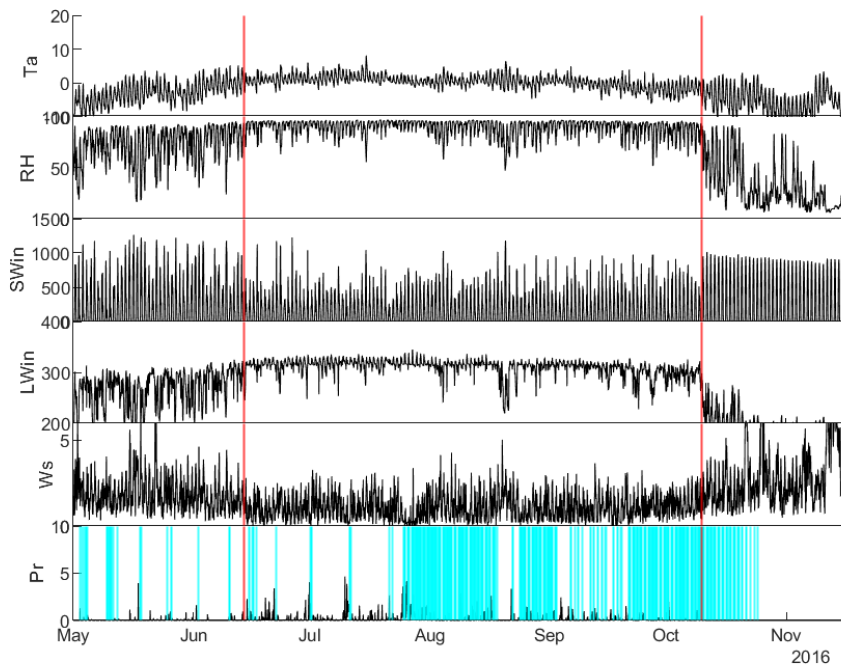

**Figure S5.** Meteorological observations on Changri Nup during the ablation season recorded by AWS; Red vertical lines indicate monsoon onset and end; cyan indicates time steps with snow cover at the AWS location, as determined from  $\alpha$  ( $>0.5$ )



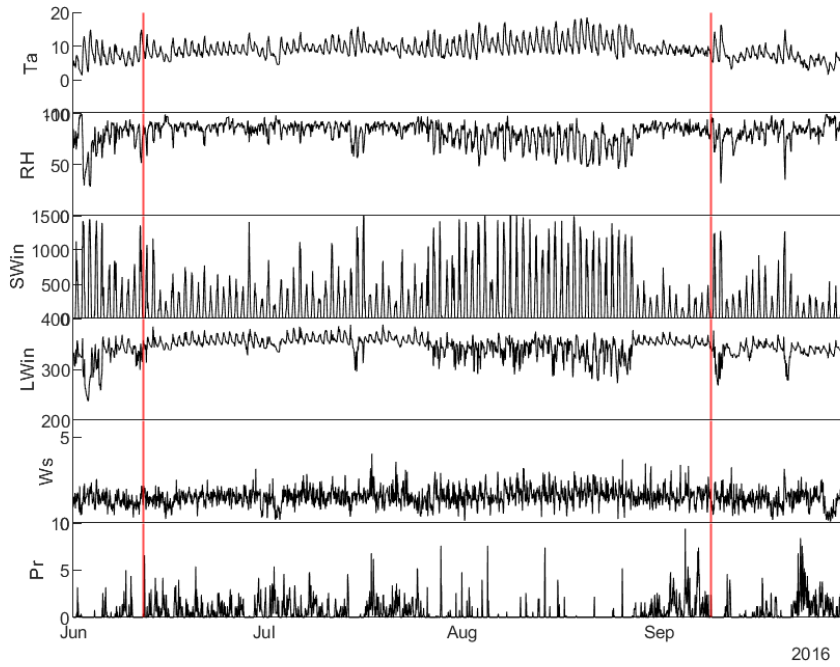

**Figure S6.** Meteorological observations on 24K during the ablation season recorded by AWS; Red vertical lines indicate monsoon onset and end; cyan indicates time steps with snow cover at the AWS location, as determined from  $\alpha$  ( $>0.5$ )

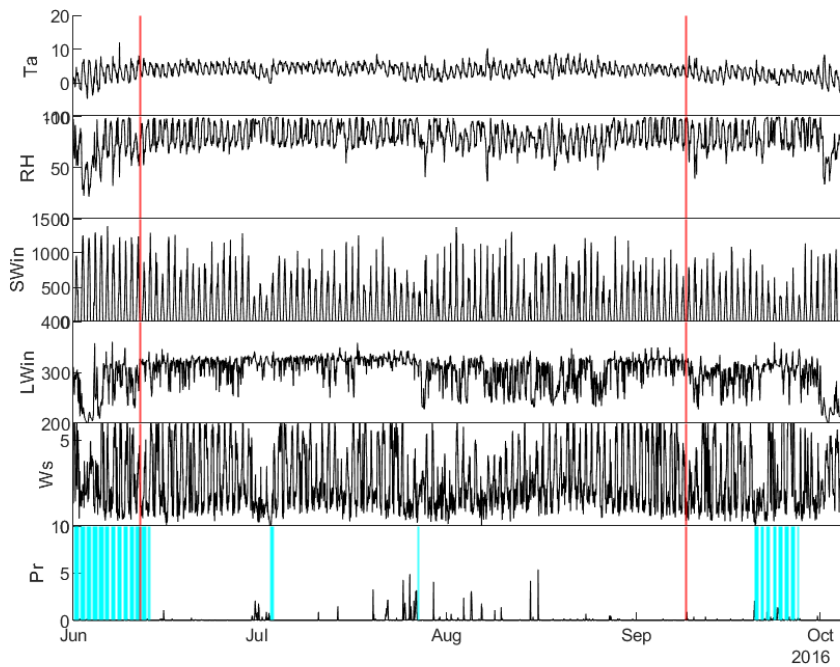

**Figure S7.** Meteorological observations on Parlung No.4 during the ablation season recorded by AWS; Red vertical lines indicate monsoon onset and end; cyan indicates time steps with snow cover at the AWS location, as determined from  $\alpha$  ( $>0.5$ )

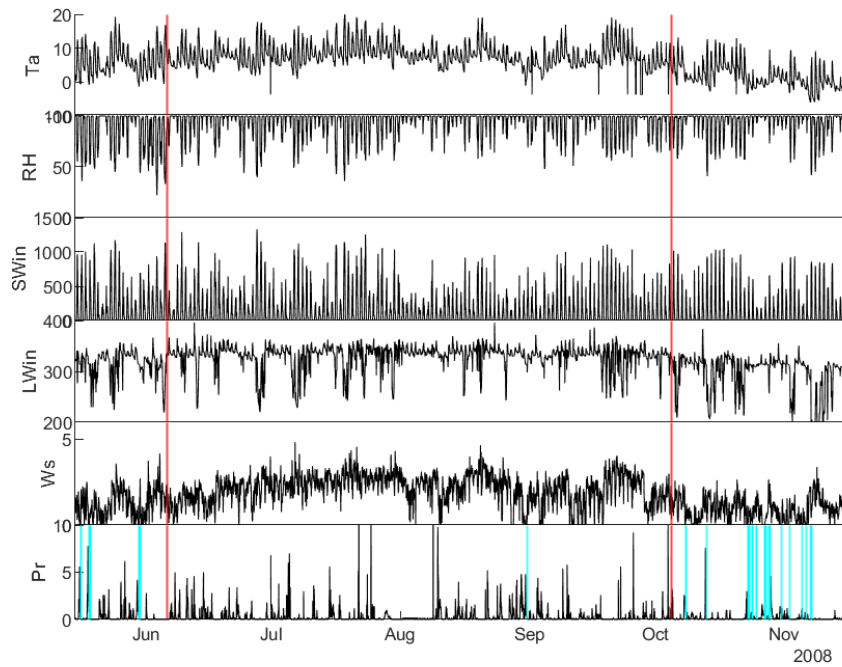

**Figure S8.** Meteorological observations on Hailuogou during the ablation season recorded by AWS; Red vertical lines indicate monsoon onset and end; cyan indicates time steps with snow cover at the AWS location, as determined from  $\alpha$  ( $>0.5$ )

**Table S1.** Air temperature  $T_a$ , mean daily precipitation  $P_r$ , relative humidity  $RH$ , vapor pressure deficit  $vpd$ , mean cloud-cover fraction  $ccf$ , temperature gradient between surface and air  $\delta_T$ , wind speed  $W_s$  and the percentage of time during which the debris is modelled to hold intercepted water  $I_n$  for each site and season, also indicating percent changes between the sub-seasons.

|            | $T_a$ [ $^{\circ}C$ ] |      |      | $P_r$ [ $mm\ d^{-1}$ ] |      |       | $W_s$ [ $m\ s^{-1}$ ] |       |       | $RH$ [-] |      |       | $vpd$ [ $Pa$ ] |        |       | $\delta_T$ [ $^{\circ}C\ m^{-1}$ ] |       |       | $I_n$ [%] |      |       |      |
|------------|-----------------------|------|------|------------------------|------|-------|-----------------------|-------|-------|----------|------|-------|----------------|--------|-------|------------------------------------|-------|-------|-----------|------|-------|------|
|            | pre                   | mon  | post | pre                    | mon  | post  | pre                   | mon   | post  | pre      | mon  | post  | pre            | mon    | post  | pre                                | mon   | post  | pre       | mon  | post  |      |
| <b>LIR</b> | mean                  | 6.4  | 8.5  | 3.3                    | 1.8  | 4.4   | 0.1                   | 0.47  | 0.27  | 0.52     | 68.1 | 90.8  | 67.1           | 318.8  | 103.5 | 262.5                              | 1.19  | 0.78  | 0.89      | 40.1 | 74.0  | 26.4 |
|            | $\Delta$              |      | 2.1  | -5.2                   | 2.6  | -4.3  |                       | -0.19 | 0.24  |          | 22.6 | -23.6 |                | -215.3 | 159.1 |                                    | -0.40 | 0.10  |           | 33.9 | -47.6 |      |
| <b>LAN</b> | mean                  | 3.1  | 5.7  | 0.5                    | 2.2  | 5.9   | 0.3                   | 1.79  | 1.10  | 1.27     | 80.7 | 96.9  | 56.3           | 152.1  | 28.7  | 282.3                              | 1.02  | 0.97  | 0.95      | 38.8 | 75.3  | 9.5  |
|            | $\Delta$              |      | 2.6  | -5.2                   | 3.7  | -5.6  |                       | -0.68 | 0.17  |          | 16.2 | -40.6 |                | -123.5 | 253.6 |                                    | -0.05 | -0.02 |           | 36.5 | -65.8 |      |
| <b>YAL</b> | mean                  | -2.6 | 1.2  | -4.1                   | 2.0  | 17.0  | 345.2                 | 1.74  | 1.00  | 1.68     | 69.8 | 93.0  | 39.4           | 156.1  | 47.1  | 278.4                              | -0.36 | -0.96 | -0.89     | -    | -     | -    |
|            | $\Delta$              |      | 3.8  | -5.3                   | 15.1 | 328.2 |                       | -0.74 | 0.67  |          | 23.2 | -53.6 |                | -109.1 | 231.4 |                                    | -0.59 | 0.07  |           | -    | -     |      |
| <b>CNU</b> | mean                  | -2.8 | 0.4  | -4.7                   | 0.5  | 3.1   | 0.0                   | 1.88  | 1.09  | 2.48     | 71.2 | 89.2  | 39.3           | 147.4  | 68.1  | 270.5                              | 1.69  | 0.25  | 0.89      | 16.2 | 79.3  | 5.3  |
|            | $\Delta$              |      | 3.1  | -5.1                   | 2.6  | -3.1  |                       | -0.79 | 1.39  |          | 18.1 | -50.0 |                | -79.3  | 202.3 |                                    | -1.44 | 0.64  |           | 63.1 | -74.0 |      |
| <b>24K</b> | mean                  | 7.3  | 9.8  | 6.9                    | 6.5  | 13.8  | 18.3                  | 1.33  | 1.56  | 1.35     | 73.1 | 80.6  | 81.2           | 279.3  | 238.0 | 189.2                              | 1.86  | 0.73  | 0.18      | 56.8 | 79.1  | 84.3 |
|            | $\Delta$              |      | 2.5  | -2.9                   | 7.3  | 4.5   |                       | 0.22  | -0.21 |          | 7.4  | 0.7   |                | -41.3  | -48.8 |                                    | -1.13 | -0.55 |           | 22.3 | 5.2   |      |
| <b>NO4</b> | mean                  | 0.9  | 4.1  | 0.4                    | 2.4  | 1.7   | 0.7                   | 2.96  | 2.67  | 3.23     | 65.7 | 81.3  | 73.1           | 230.8  | 153.9 | 173.9                              | -0.78 | -2.01 | -0.62     | -    | -     | -    |
|            | $\Delta$              |      | 3.2  | -3.7                   | -0.7 | -1.0  |                       | -0.28 | 0.56  |          | 15.7 | -8.3  |                | -76.9  | 20.0  |                                    | -1.22 | 1.39  |           | -    | -     |      |
| <b>HAI</b> | mean                  | 6.1  | 7.8  | -2.1                   | 8.5  | 7.8   | 2.4                   | 1.23  | 2.15  | 0.93     | 81.3 | 92.3  | 90.6           | 182.4  | 83.8  | 52.3                               | -2.08 | -2.61 | 0.38      | 99.8 | 100.0 | 75.6 |
|            | $\Delta$              |      | 1.7  | -9.9                   | -0.7 | -5.4  |                       | 0.91  | -1.22 |          | 10.9 | -1.6  |                | -98.6  | -31.5 |                                    | -0.53 | 2.99  |           | 0.2  | -24.4 |      |

### S3. Aerodynamic resistance and aerodynamic roughness

The aerodynamic resistance quantifies the ability of the surface boundary layer to resist or intensify turbulent transport of momentum, heat and water vapor. We calculate the aerodynamic resistances to heat flux  $r_{ah}$  and water vapor  $r_{aw}$  using the simplified solution of the Monin-Obukhov similarity theory, introduced by Mascart et al. (1995) and implemented into the ISBA landsurface model Noilhan and Mahfouf (1996). This parameterization of the full Monin-Obukhov similarity theory (Monin and Obukhov, 1954) is computationally less demanding, while providing concurring results (Fatichi, 2010). In T&C, the common assumption is of a single aerodynamic resistance (e.g. Viterbo and Beljaars, 1995; Ivanov et al., 2008), is used, such that  $r_{ah} = r_{aw}$ . To gain  $r_{ah}$ , in the simplified solution, a bulk transfer coefficient  $C_h$  can be expressed as:

$$855 \quad C_h = 1 \frac{r_{ah}}{W_s} = C_n F_h(Ri_B) \quad (17)$$

where the neutral transport coefficient  $C_n$  is:

$$C_n = \frac{k^2}{\ln[(z_{atm} - d)/z_{om}]^2} \quad (18)$$

860 and the empirical function of the bulk Richardson number  $Ri_B$  is:

$$F_h(Ri_B) = \begin{cases} \left[ 1 - \frac{15 Ri_B}{1 + c_h \sqrt{|Ri_B|}} \right] \left[ \frac{\ln[(z_{atm} - d)/z_{om}]}{\ln[(z_{atm} - d)/z_{oh}]} \right], & \text{if } Ri_B \leq 0 \\ \left[ \frac{1}{1 + 15 Ri_B \sqrt{1 + 5 Ri_B}} \right] \left[ \frac{\ln[(z_{atm} - d)/z_{om}]}{\ln[(z_{atm} - d)/z_{oh}]} \right], & \text{if } Ri_B > 0 \end{cases} \quad (19)$$

wherein

$$c_h = 15 c_h^* C_n [(z_{atm} - d)]^{p_h} \left[ \frac{\ln[(z_{atm} - d)/z_{om}]}{\ln[(z_{atm} - d)/z_{oh}]} \right] \quad (20)$$

865

$$c_h^* = 3.2165 + 4.3431\mu + 0.5360\mu^2 - 0.0781\mu^3 \quad (21)$$

$$p_h = 0.5892 - 0.1571\mu + 0.0327\mu^2 - 0.0026\mu^3 \quad (22)$$

$$870 \quad \mu = \ln(z_{om}/z_{oh}) \quad (23)$$

To prevent a full inhibition of turbulent transport under wind-still conditions ( $r_{ah}$  would become infinite), when  $W_s < 0.05 \text{ m s}^{-1}$ , we calculate  $C_h$  following Beljaars (1995):

$$C_h = \frac{1}{r_{ah}} = 0.15 \left[ \frac{g\nu}{0.5(T_s + T_a)Pr^2} \right]^{1/3} (T_s - T_a)^{1/3} \quad (24)$$

where  $\nu = 1.5110^{-5} [m^2 s^{-1}]$  and the Prandtl number  $Pr = 0.71$ .

875 As a consequence of the assumption explained above ( $r_{ah} = r_{aw}$ ), also the aerodynamic roughnesses of heat and water vapour  
are used as equal ( $z_{ow} = z_{oh}$ ) and  $z_{0h} = z_{0w} = 0.1z_{0m}$ . For the ratio  $r$  between the roughness lengths of water vapour, heat  
and momentum,  $r = 0.1$  is a value based on (Brutsaert, 1982), often implemented in land surface models (e.g. Noilhan and  
Mahfouf, 1996), and is also used in TC. This ratio remains poorly constrained, not least due to the difficulties in measuring  
or deriving surface roughnesses (Miles et al., 2017; Quincey et al., 2017). Three values have been suggested in the literature:  
880  $r = 1$  (e.g. Reid and Brock, 2010),  $r = 0.1$  (e.g. Giese et al., 2020)  $r = 0.05$  (Steiner et al. 2018), who derived this value for  
Lirung from flux tower experiments. Since here,  $z_{0h}$ ,  $z_{0w}$  and  $z_{0m}$  were effectively optimised together at the debris-covered  
glaciers, the turbulent fluxes remain insensitive to the choice of this ratio.

## S4. Extended Results

**Table S2.** RMSE values for modelled vs. measured  $T_s$  at all sites. Measured  $T_s$  were derived from  $LW_{\downarrow}$  and  $LW_{\uparrow}$  measurements considering the entire modelling period at all sites

|      |      | Lirung | Langtang | Yala | Changri Nup | 24K | Parlung No.4 | Hailuogou |
|------|------|--------|----------|------|-------------|-----|--------------|-----------|
| RMSE | [°C] | 2.3    | 2.2      | 2.99 | 2.6         | 1.8 | 2.89         | 1.0       |

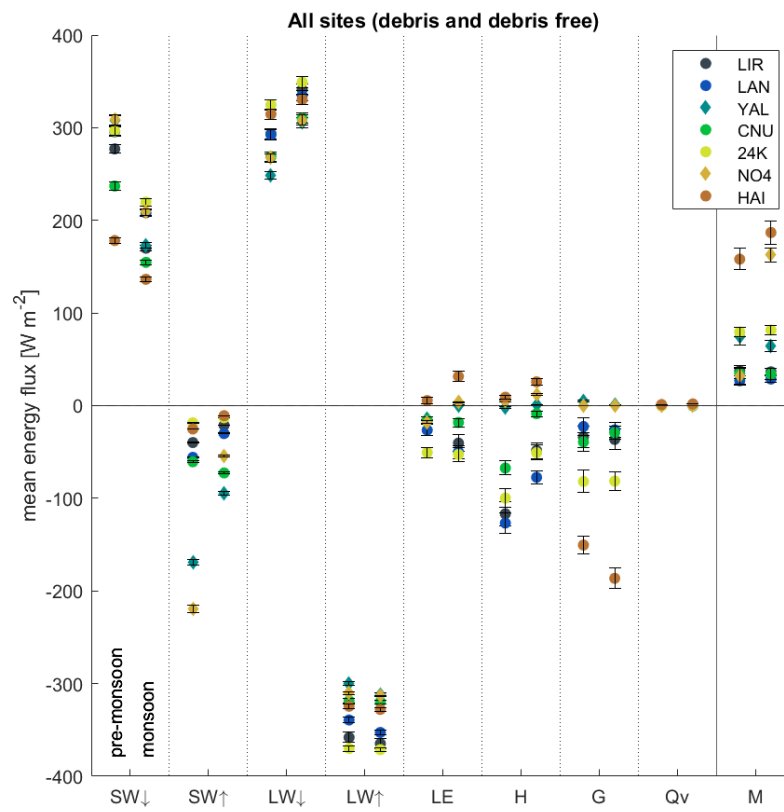

**Figure S9.** All energy balance components of all glaciers in comparison, split into pre-monsoon and monsoon; black bars indicate the uncertainty range;

**Table S3.** Mean energy balance components at each site and for pre-monsoon (pre), monsoon (mon), and post-monsoon (post) periods, as well as flux magnitude changes from pre-monsoon to monsoon, and monsoon to post-monsoon. All values are in  $W m^{-2}$ .

| fluxes in $W/m^2$ | $SW_{\downarrow}$ |       | $SW_{\uparrow}$ |       | $LW_{\downarrow}$ |       | $LW_{\uparrow}$ |       | $LE$  |        |        |        |        |       |       |       |
|-------------------|-------------------|-------|-----------------|-------|-------------------|-------|-----------------|-------|-------|--------|--------|--------|--------|-------|-------|-------|
|                   | pre               | mon   | post            | pre   | mon               | post  | pre             | mon   | post  | pre    | mon    | post   |        |       |       |       |
| <b>LJR</b>        | mean              | 277.1 | 170.0           | 224.1 | -39.8             | -21.1 | -41.3           | 293.3 | 341.2 | 264.0  | -358.1 | -364.8 | -340.4 | -16.0 | -40.4 | -19.0 |
|                   | $\Delta$          |       | -107.1          | 54.1  |                   | 18.7  | -20.2           |       | 47.9  | -77.2  |        | -6.7   | 24.4   |       | -24.4 | 38.5  |
| <b>LAN</b>        | mean              | 295.6 | 208.1           | 262.4 | -55.9             | -30.1 | -48.6           | 292.3 | 334.7 | 238.6  | -339.3 | -352.8 | -326.1 | -26.4 | -49.9 | -5.8  |
|                   | $\Delta$          |       | -87.5           | 54.3  |                   | 25.7  | -18.4           |       | 42.3  | -96.0  |        | -13.5  | 26.7   |       | -23.5 | 44.1  |
| <b>YAL</b>        | mean              | 307.7 | 172.7           | 271.8 | -169.4            | -94.4 | -195.0          | 248.5 | 305.5 | 212.3  | -299.8 | -311.6 | -287.1 | -13.7 | 0.1   | -12.2 |
|                   | $\Delta$          |       | -135.0          | 99.1  |                   | 75.0  | -100.6          |       | 57.0  | -93.2  |        | -11.7  | 24.4   |       | 13.7  | -12.3 |
| <b>CNU</b>        | mean              | 237.1 | 154.7           | 258.1 | -60.6             | -72.7 | -126.0          | 268.8 | 310.2 | 196.4  | -318.7 | -319.7 | -300.4 | -15.7 | -18.1 | -3.1  |
|                   | $\Delta$          |       | -82.4           | 103.4 |                   | -12.1 | -53.3           |       | 41.5  | -113.8 |        | -1.0   | 19.3   |       | -2.5  | 15.0  |
| <b>24K</b>        | mean              | 296.6 | 219.7           | 140.9 | -18.5             | -13.0 | -8.3            | 324.6 | 349.3 | 336.6  | -369.9 | -371.3 | -351.0 | -50.6 | -52.7 | -40.0 |
|                   | $\Delta$          |       | -76.9           | -78.8 |                   | 5.4   | 4.7             |       | 24.7  | -12.7  |        | -1.3   | 20.3   |       | -2.1  | 12.7  |
| <b>NO4</b>        | mean              | 308.5 | 209.1           | 197.3 | -219.6            | -54.8 | -81.5           | 267.5 | 308.2 | 261.5  | -310.3 | -313.4 | -310.5 | -17.6 | 3.6   | -18.5 |
|                   | $\Delta$          |       | -99.5           | -11.8 |                   | 164.8 | -26.7           |       | 40.7  | -46.7  |        | -3.1   | 2.9    |       | 21.2  | -22.1 |
| <b>HAI</b>        | mean              | 178.2 | 136.4           | 105.8 | -25.2             | -10.8 | -28.4           | 314.6 | 330.3 | 273.1  | -324.5 | -327.9 | -309.1 | 5.4   | 31.6  | -4.8  |
|                   | $\Delta$          |       | -41.8           | -30.6 |                   | 14.4  | -17.6           |       | 15.7  | -57.2  |        | -3.4   | 18.8   |       | 26.2  | -36.4 |

  

| fluxes in $W/m^2$ | $H$      |        | $G$   |        | $dG$   |        | $Q_v$ |      | $M$   |      |      |      |      |        |        |        |
|-------------------|----------|--------|-------|--------|--------|--------|-------|------|-------|------|------|------|------|--------|--------|--------|
|                   | pre      | mon    | post  | pre    | mon    | post   | pre   | mon  | post  | pre  | mon  | post |      |        |        |        |
| <b>LJR</b>        | mean     | -116.7 | -48.4 | -86.5  | -33.7  | -36.4  | -18.7 | 5.6  | 0.0   | 16.6 | 0.0  | 0.0  | 0.0  | -37.5  | -36.5  | -19.0  |
|                   | $\Delta$ |        | 68.3  | -38.0  |        | -2.7   | 17.8  |      | -5.6  | 16.6 |      | 0.0  | 0.0  |        | 1.0    | -17.5  |
| <b>LAN</b>        | mean     | -126.7 | -77.4 | -111.4 | -22.5  | -26.2  | -7.8  | 2.2  | 0.0   | 27.3 | 0.0  | -0.3 | 0.0  | -26.9  | -28.7  | -10.4  |
|                   | $\Delta$ |        | 49.3  | -34.1  |        | -3.7   | 18.4  |      | -2.2  | 27.3 |      | -0.3 | 0.3  |        | -1.8   | -18.4  |
| <b>YAL</b>        | mean     | -2.3   | 0.5   | 1.4    | 4.7    | 0.9    | 0.0   | 4.7  | 0.9   | 0.0  | 0.0  | -0.2 | -4.1 | -74.8  | -64.6  | -0.3   |
|                   | $\Delta$ |        | 2.8   | 0.9    |        | -3.8   | -0.9  |      | -3.8  | -0.9 |      | -0.2 | -3.9 |        | 10.2   | -64.3  |
| <b>CNU</b>        | mean     | -67.4  | -8.7  | -36.1  | -39.2  | -29.1  | 10.4  | 17.1 | 1.8   | 10.6 | 0.0  | 0.0  | 0.0  | -34.6  | -34.1  | -0.2   |
|                   | $\Delta$ |        | 58.7  | -27.4  |        | 10.1   | 39.5  |      | -15.3 | 8.9  |      | 0.0  | 0.0  |        | 0.5    | -33.9  |
| <b>24K</b>        | mean     | -99.8  | -50.8 | -24.4  | -81.8  | -81.4  | -53.1 | 0.3  | 0.0   | 0.0  | -0.3 | 0.2  | 0.6  | -79.5  | -81.6  | -53.7  |
|                   | $\Delta$ |        | 49.0  | 26.4   |        | 0.4    | 28.4  |      | -0.3  | 0.0  |      | 0.6  | 0.4  |        | -2.1   | -27.9  |
| <b>NO4</b>        | mean     | 4.7    | 12.3  | 5.8    | 0.2    | 0.1    | 0.1   | 0.2  | 0.1   | 0.0  | 0.2  | 0.2  | 0.0  | -32.3  | -162.6 | -54.1  |
|                   | $\Delta$ |        | 7.6   | -6.6   |        | -0.1   | -0.1  |      | -0.1  | -0.1 |      | 0.0  | -0.2 |        | -130.4 | -108.5 |
| <b>HAI</b>        | mean     | 9.1    | 25.7  | -9.9   | -150.4 | -186.4 | -16.5 | 1.8  | 0.5   | 17.6 | 1.2  | 1.9  | 0.1  | -158.1 | -186.8 | -36.9  |
|                   | $\Delta$ |        | 16.6  | -35.5  |        | -35.9  | 169.9 |      | -1.4  | 17.2 |      | 0.7  | -1.8 |        | -28.7  | -149.9 |



## S5. Sensitivity of seasonal flux changes to elevation and debris thickness

885 Assuming that the strongest changes in meteorological forcing with elevation would be the  $Ta$ , which in turns controls the precipitation partition and the albedo, we re-run the model varying  $Ta$  under applying a temperature lapse rate of  $0.6^{\circ}C/100m$  and, for the debris-covered sites, by varying also the debris thickness in the range 10-80 cm (for ranges and steps see Table S4). Using the station-measured, accumulated albedo is not appropriate during this experiment, due to changing snow conditions with varying elevation. We therefore include the parameterisation introduced by Ding et al. (2017) for modelling  $\alpha$ . From the

890 resulting range of EB flux outputs, we calculate the range of expected changes for the entire ablation zone when moving from pre-monsoon to monsoon ( $\Delta$ -range). This allows us to place our results in the context of the changes that can be expected over the entire ablation zone, given its elevation span and debris thickness variability. Figure 8 shows that even accounting for the range of conditions across each glacier ablation area, the pattern of pre-monsoon to monsoon difference in flux components, and importantly  $M$ , remain similar for debris-covered sites: The  $\Delta$ -range of  $M$  stays within the uncertainty range, with the

895 exception of Langtang, where the unrealistic combination of relatively thin debris and low elevation causes high  $M$   $\Delta$ -range. This lends confidence to the results obtained at the individual AWS locations. Although we adjusted forcing data for elevation in this exercise, we could not represent the effects of variable debris thicknesses in modifying  $2m$  meteorological variables (Steiner and Pellicciotti, 2016; Shaw et al., 2016). This comes with the assumption that surface-atmosphere interactions are negligible compared to the altitudinal patterns and temporal changes. While this might be acceptable at thicker debris sites, it is

900 more questionable at Hailuogou, where the observations were taken above thin and cold debris. However, also at this site, the  $\Delta$ -range ends up to be small ( $5 W m^{-2}$ ) and close to zero when debris between 10 and 80  $cm$  thickness is applied artificially.

**Table S4.** Ranges of elevations and debris thicknesses used for the sensitivity runs, including the glacier terminus elevation (min), the AWS elevation (AWS) and the upper debris limit on debris-covered glaciers or to the approximated ELA elevation on clean-ice glaciers (max). We also show the range of debris thicknesses  $h_m$  modelled for debris-covered glacier sites. All combinations of elevations and debris thicknesses were used.

| Glacier  |                                | Lirung | Langtang | Yala | Changri Nup | 24K  | Parlung No.4 | Hailuogou |
|----------|--------------------------------|--------|----------|------|-------------|------|--------------|-----------|
| min      | [m.asl]                        | 3990   | 4500     | 5170 | 5270        | 3910 | 4620         | 2980      |
| AWS      | [m.asl]                        | 4076   | 4557     | 5350 | 5471        | 3900 | 4800         | 3550      |
| max      | [m.asl]                        | 4400   | 5600     | 5400 | 5600        | 4200 | 5400         | 3700      |
| h_d [cm] | 10, 20, 30, 40, 50, 60, 70, 80 |        |          |      |             |      |              |           |

## S6. Controls on turbulent fluxes

To understand which climatic variables of the boundary layer control the turbulent fluxes on debris-covered glaciers, regression models were fitted to the modelled values of the energy fluxes  $H$  and  $LE$  at the hourly timescale, and for pre-monsoon and monsoon separately. A summary figure is given in the main text (Figure 4.5). Values of  $0 W m^2$  were removed from  $LE$ , which appear at timesteps when no water is available at the debris surface. The predictive power of three variables and their combination was determined and evaluated with adjusted  $R^2$ : (i) The temperature gradient between surface and air  $\delta_T [^{\circ}C^{-1}]$ :

$$\delta_T(t) = Ts(t) - Ta(t) \quad (25)$$

(ii) the vapour pressure deficit  $vpd [Pa]$ :

$$910 \quad vpd(t) = esat(t) - ea(t) \quad (26)$$

where  $ea [Pa]$  is the vapor pressure and  $esat [Pa]$  is the saturated vapor pressure, and (iii) the wind speed  $Ws$ . Univariate quadratic regression models fitted for single predictors had the form:

$$y(t) = a + bx(t) + cx(t)^2 \quad (27)$$

and multivariate linear regression models fitted for multiple predictors had the form:

$$915 \quad y(t) = a + bx_1(t) + bx_2(t) + bx_3(t) \quad (28)$$

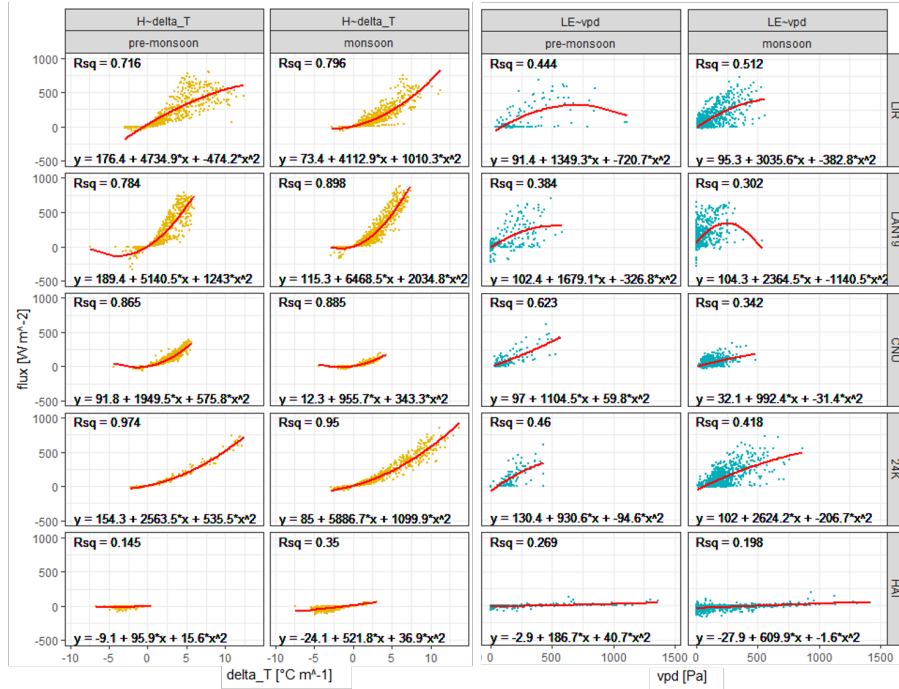

**Figure S10. (a)** Regression plots for temperature gradient between surface and air  $\delta_T$  against  $H$  and vapor pressure deficit  $vpd$  against  $LE$  for the debris cover sites, separately for pre-monsoon and monsoon. Fitted model (red line), adj. $R^2$  and model equation.

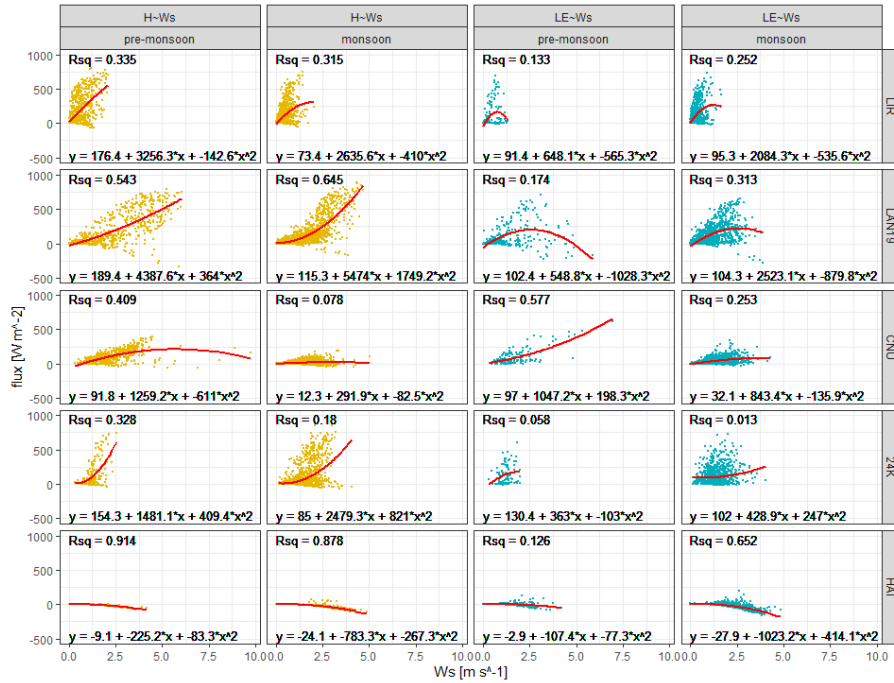

**Figure S11. (a)** Regression plots for wind speed  $W_s$  against  $H$  and  $LE$  for the debris cover sites, separately for pre-monsoon and monsoon. Fitted model (red line), adj. $R^2$  and model equation.
